# Supplementary material
Source: publisher figshare collection journal article supplement (https://aacr.figshare.com/articles/dataset/_/22545054)

# Figure S1

## A Progression-free Survival

CXCL9 in ERP105482  
SKCM anti-PD1

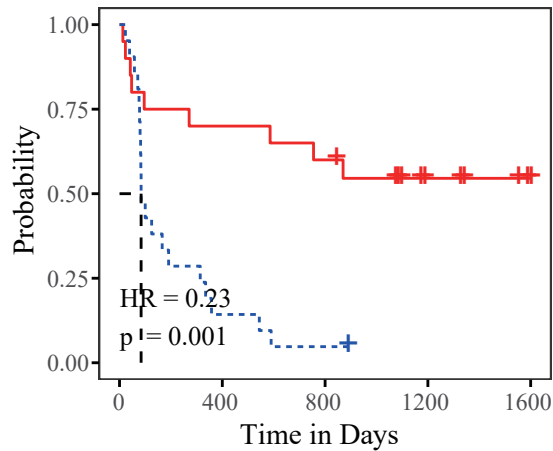

CXCL10 in ERP105482  
SKCM anti-PD1

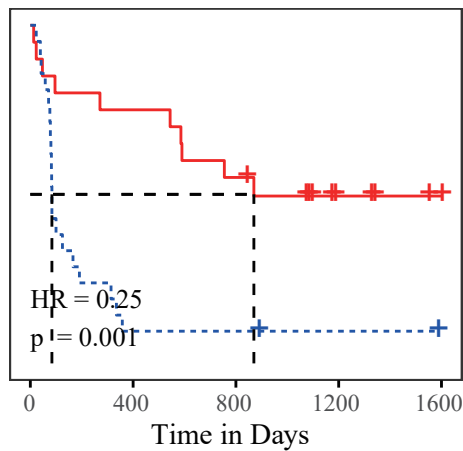

CXCL9 in GSE176307  
UC anti-PD1

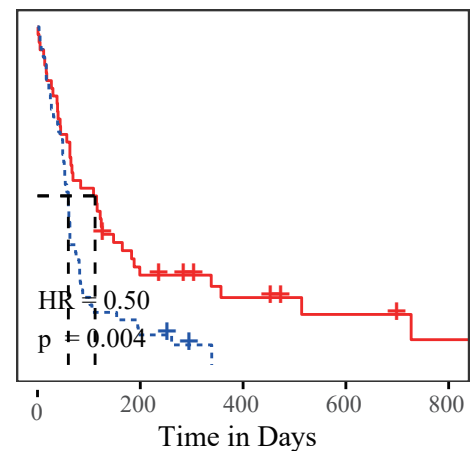

—+— High score —+— Low score

## B Overall Survival

CXCL9 in ERP105482  
SKCM anti-PD1

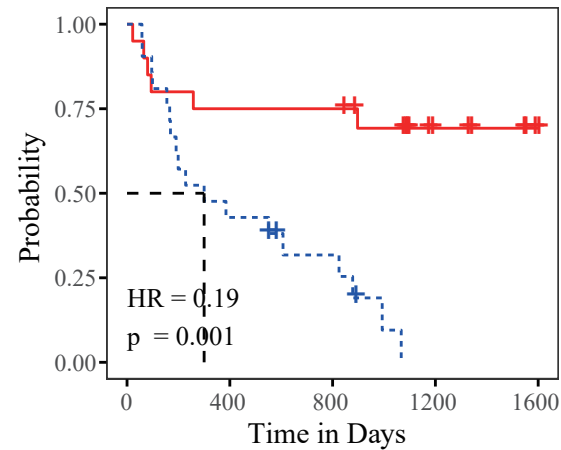

CXCL10 in ERP105482  
SKCM anti-PD1

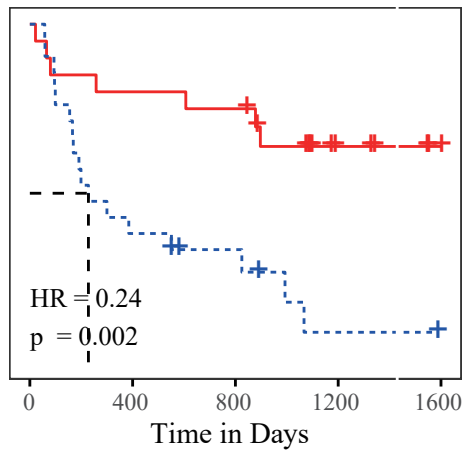

CXCL9 in GSE176307  
UC anti-PD1

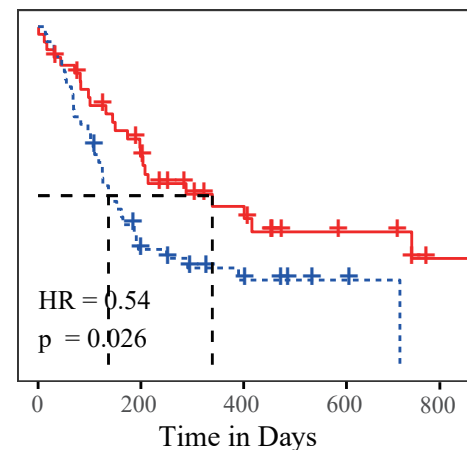

CXCL9 in IMvigor210  
UC anti-PDL1

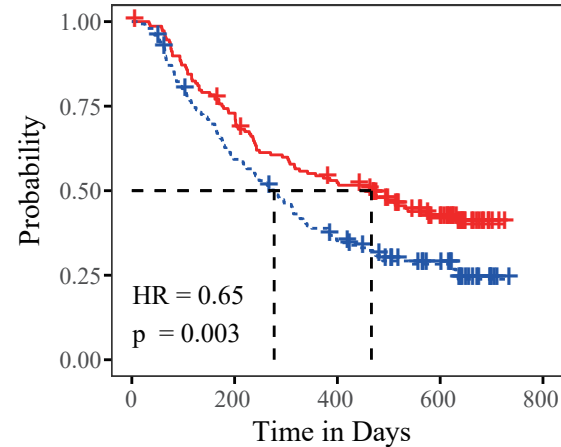

CXCL10 in IMvigor210  
UC anti-PDL1

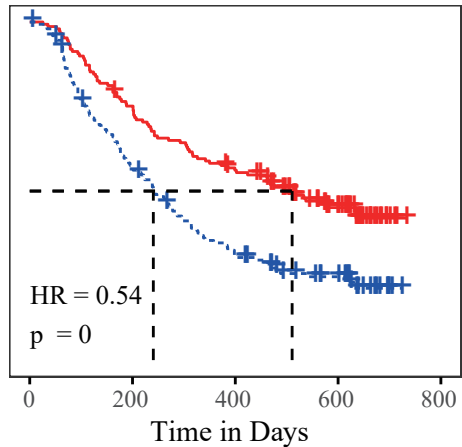

CXCL9 in PMID:32472114  
RCC anti-PD1

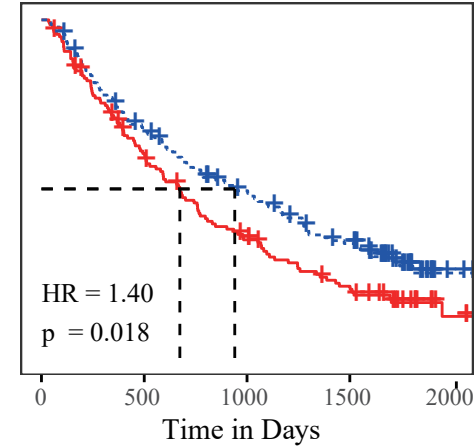

Supplement: Supplementary file 1 [file 40008483]
